# Supplementary material
Source: Springer Nature journal article supplement (https://www.springermedizin.de/resource/supplementary/12967_2011_819_MOESM1_ESM.pdf/9577116)

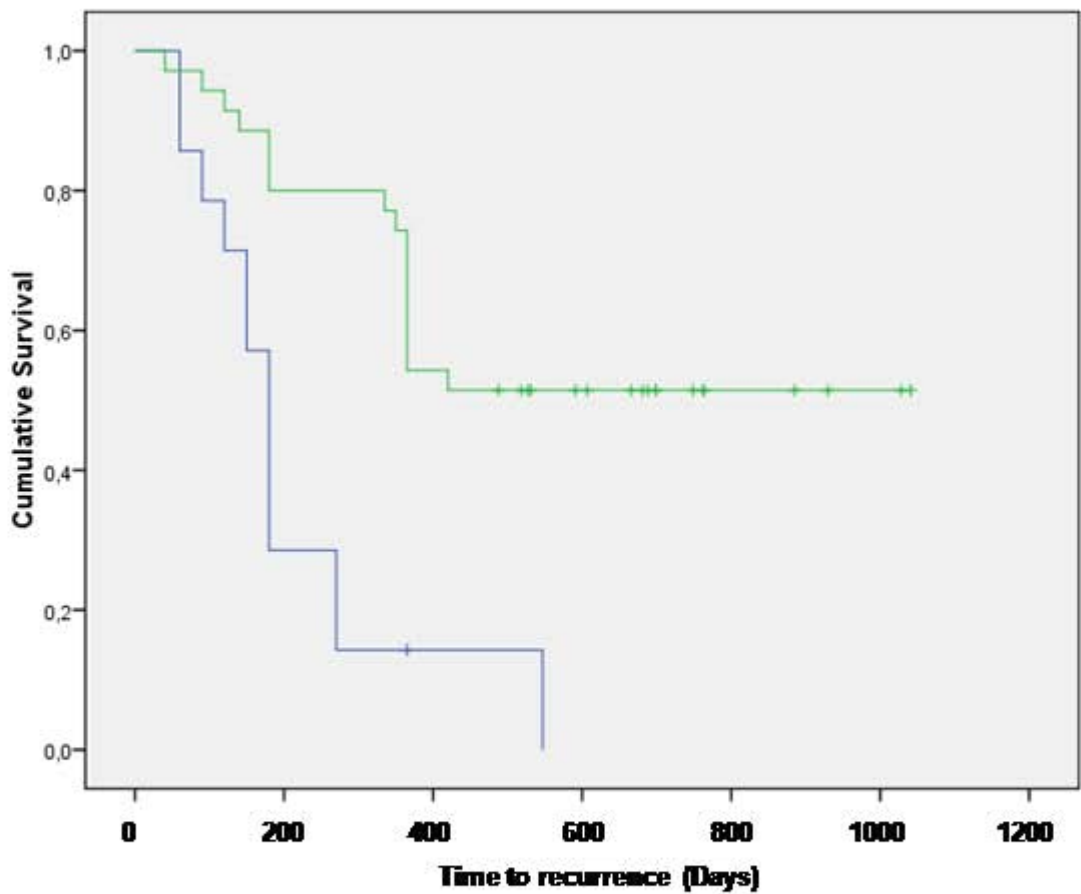

Supplement: MOESM1 [file 9577116]
